# Supplementary material for: Luminescent MOFs for selective sensing of Ag+ and other ions (Fe(iii) and Cr(vi)) in aqueous solution
Source: Royal Society of Chemistry journal article supplement (doi:10.1039/d2ce00057a), 2022-01-01
Supplement: d2ce00057a1.pdf [file d2ce00057a1.pdf]

# **Luminescent MOFs for selective sensing of Ag<sup>+</sup> and other ions(Fe(III) and Cr(VI))in aqueous solution**

Juan-Juan Shao, Jian-Ling Ni, Yu Liang, Guang-Jun Li, Li-Zhuang Chen ,Fang-Ming Wang \*

*School of Environmental and Chemical Engineering, Jiangsu University of Science and Technology, Zhenjiang, Jiangsu 212003, China*

## Supporting Information

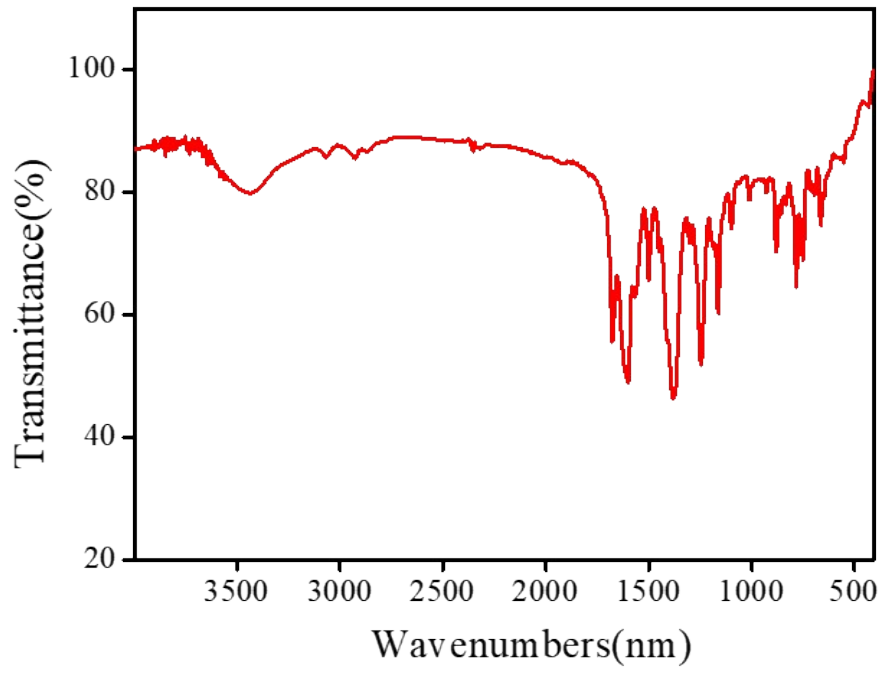

**Fig. S1.** The IR spectra of **LMOF-1**.

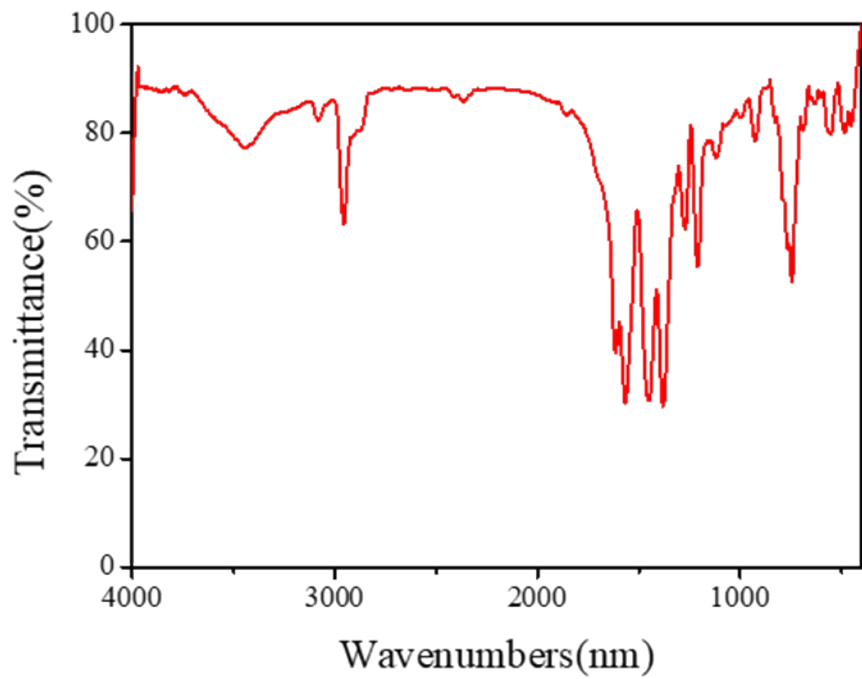

**Fig.S2.** The IR spectra of **LMOF-2**

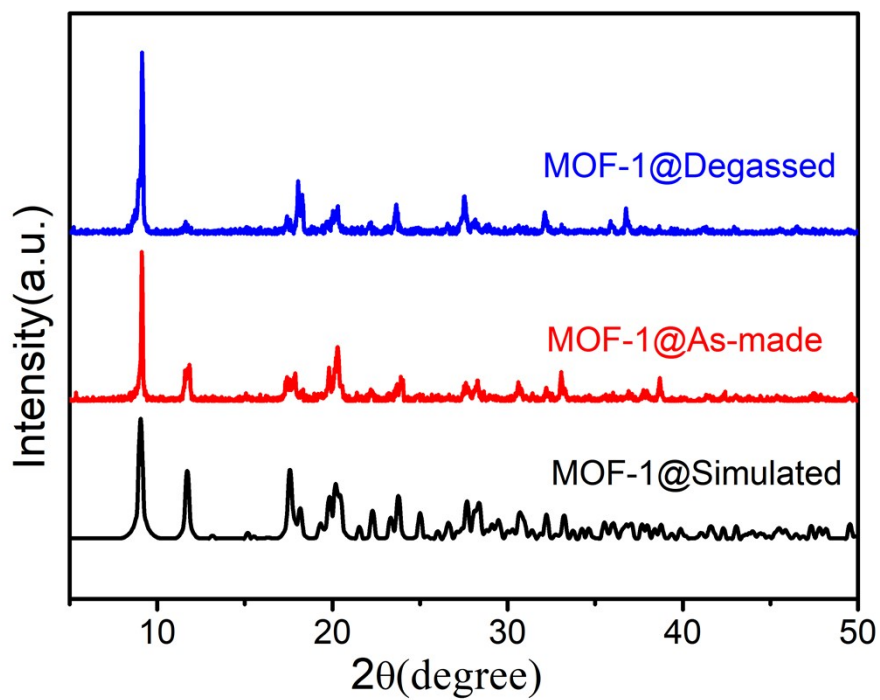

Fig. S3. PXR D patterns of LMOF-1

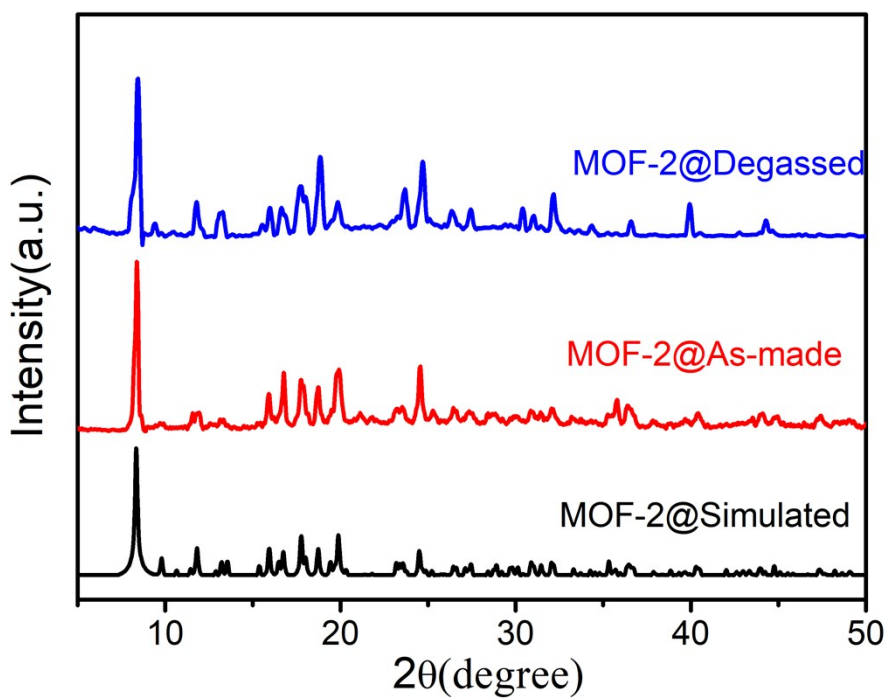

Fig. S4. PXR D patterns of LMOF-2

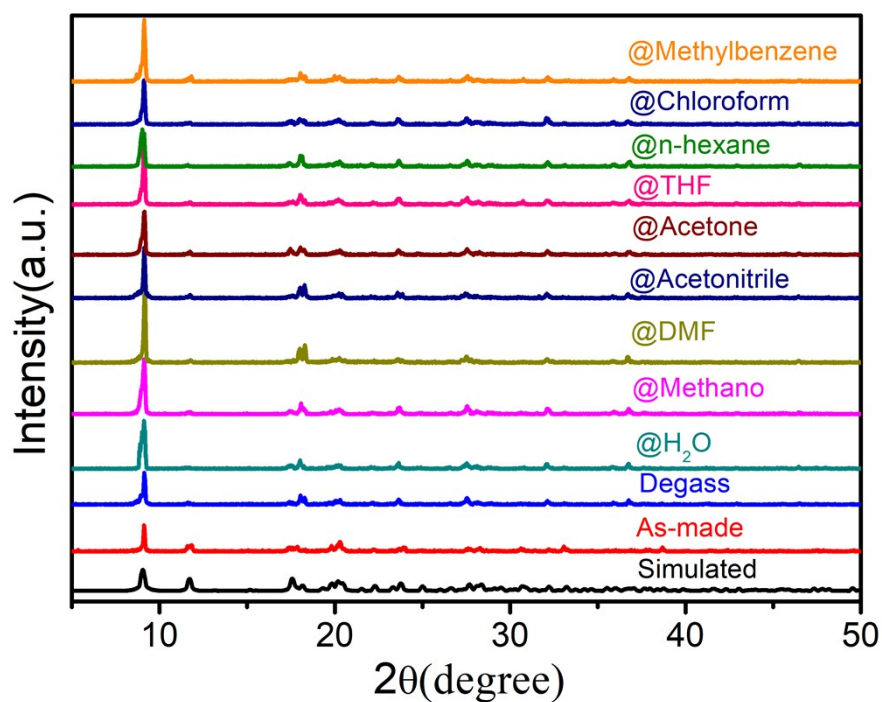

Fig. S5. The PXR D of LMOF-1 soaked in the different solvents

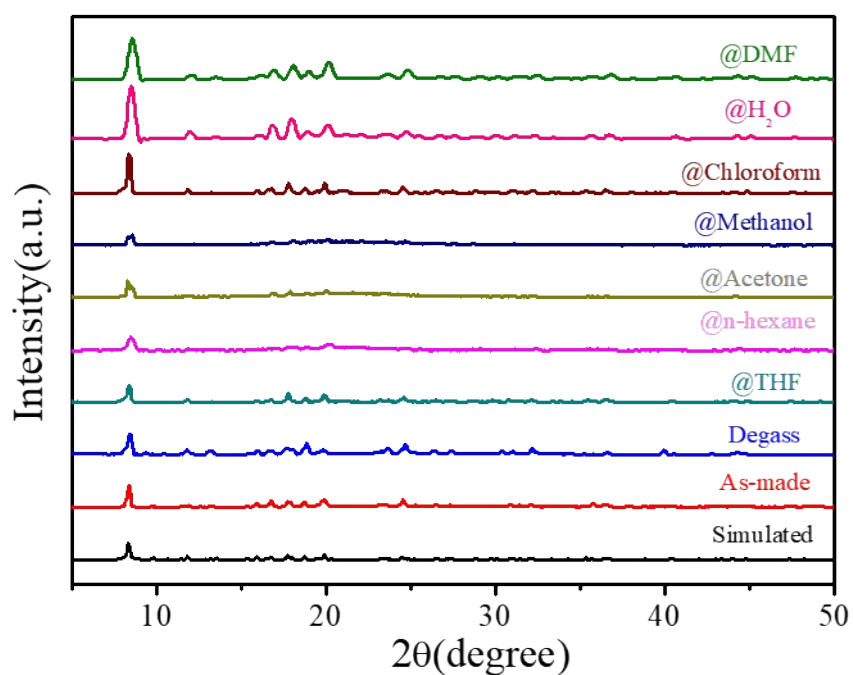

Fig. S6. The PXR D of LMOF-2 soaked in the different solvents

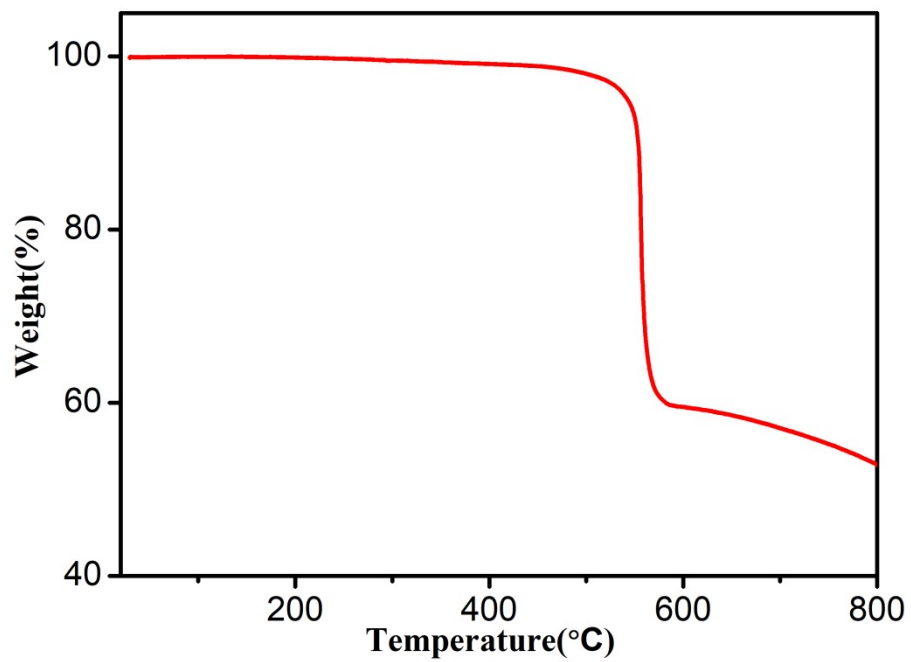

**Fig.S7** .TG curves of LMOF-1

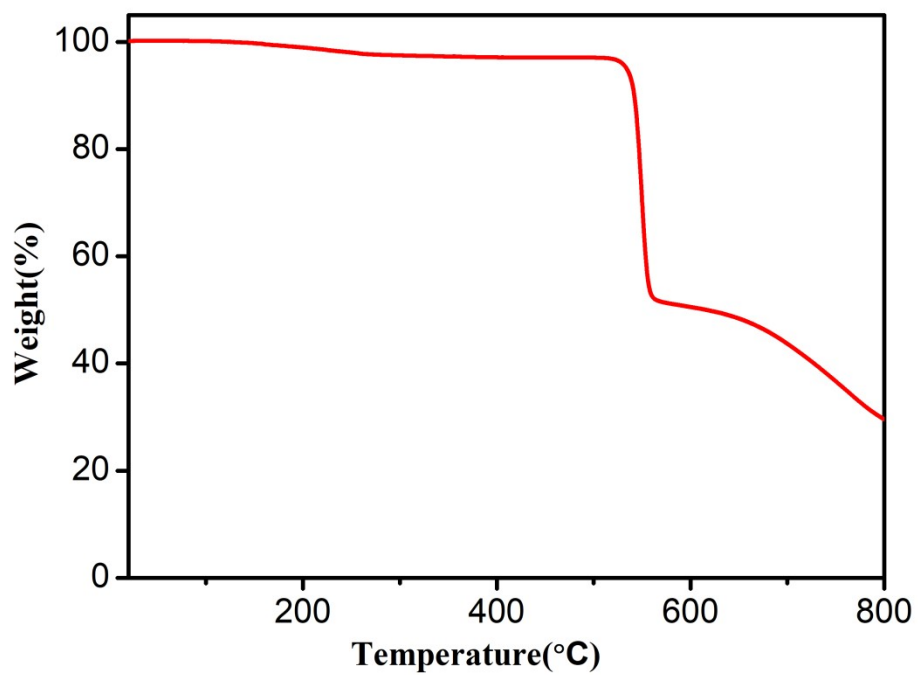

**Fig.S8**. TG curves of LMOF-2

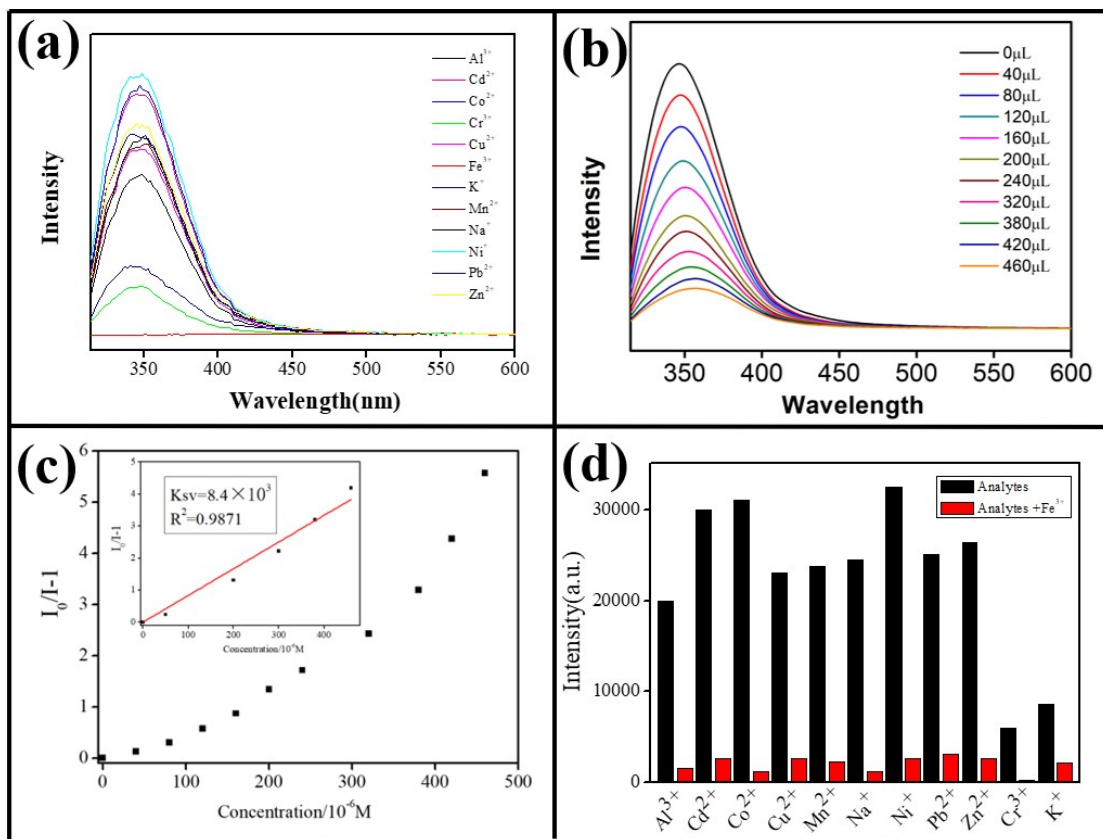

**Fig.S9.** (a) The luminescence spectra of **LMOF-2** suspension upon adding different metal cation ions. (b) The fluorescence intensity trend chart of **LMOF-2** after adding Fe<sup>3+</sup> solution. (c) The SV curves of **LMOF-2** after adding Fe<sup>3+</sup> solution. (d) Anti-interference experiment of selective recognition of Fe<sup>3+</sup>

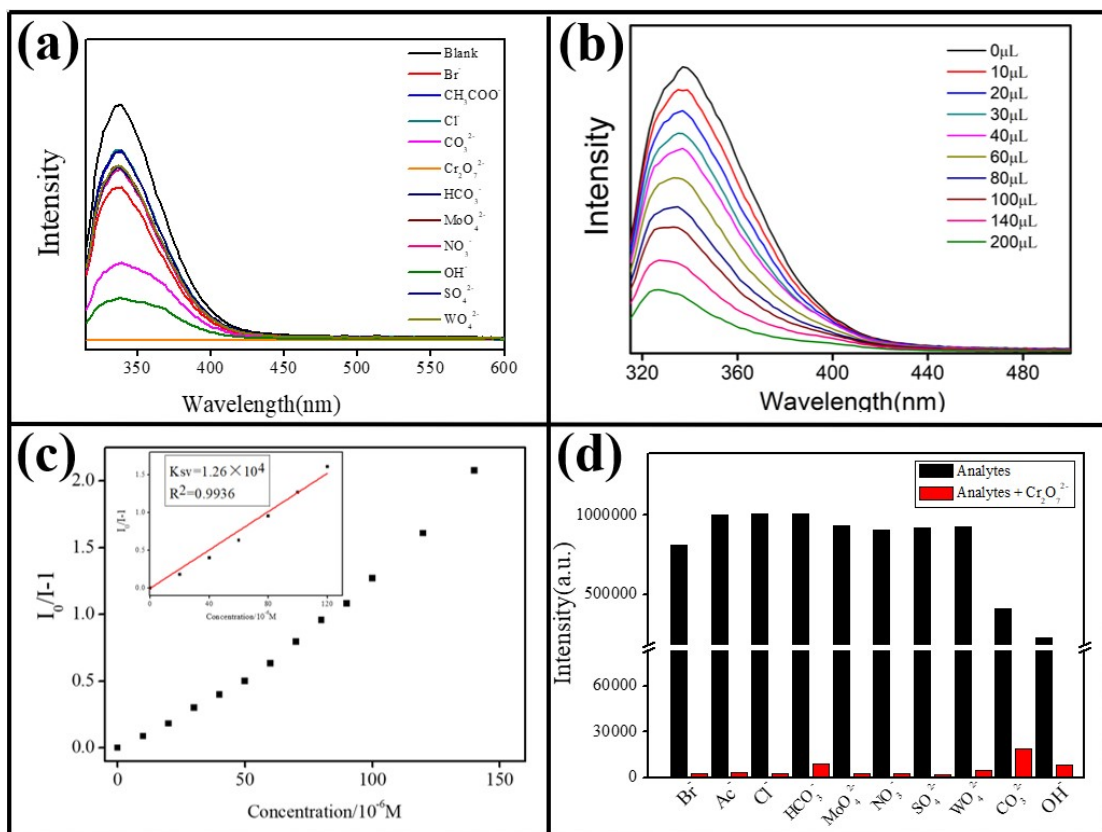

**Fig.S10.** (a) The luminescence spectra of **LMOF-2** suspension upon adding different anion. (b) The fluorescence intensity trend chart of **LMOF-2** after adding Cr<sub>2</sub>O<sub>7</sub><sup>2-</sup> solution. (c) The SV curves of **LMOF-2** after adding Cr<sub>2</sub>O<sub>7</sub><sup>2-</sup> solution. (d) Anti-interference experiment of selective recognition of Cr<sub>2</sub>O<sub>7</sub><sup>2-</sup>

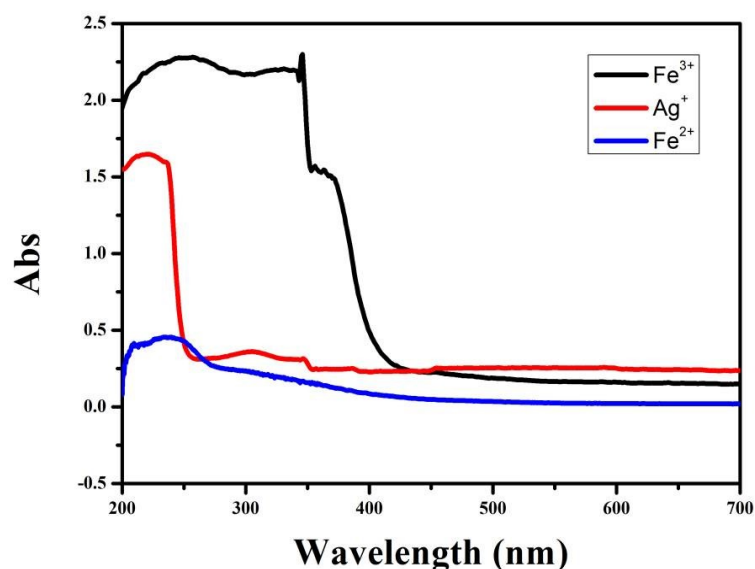

**Fig.S11.** UV absorption of Fe<sup>3+</sup>, Fe<sup>2+</sup> and Ag<sup>+</sup>

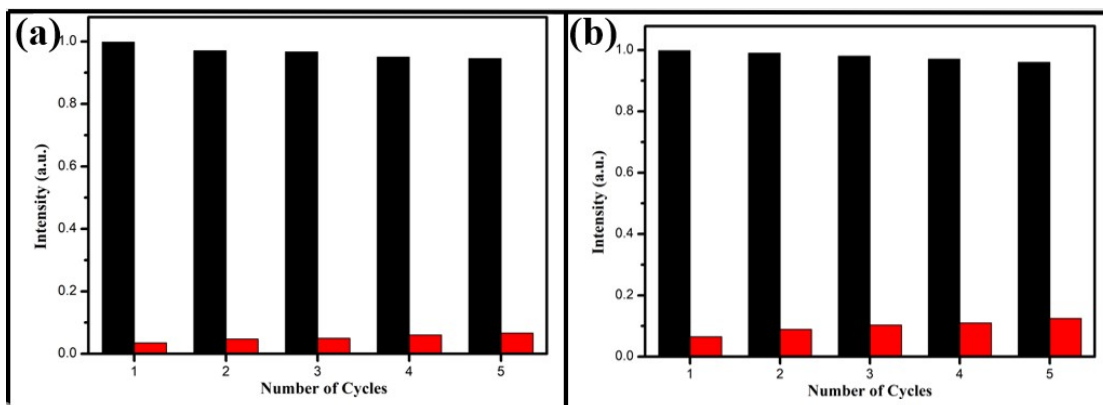

**Fig.S12.** (a) Reproducibility of the detection effect of **LMOF-2** dispersed in water in the presence of 460μL Fe<sup>3+</sup>; (b) Reproducibility of the detection effect of **LMOF-2** dispersed in water in the presence of 200μL Cr<sub>2</sub>O<sub>7</sub><sup>2-</sup>. (The black histogram represents the initial luminescence intensity, and the red histogram represents the intensity after adding 460μL Fe<sup>3+</sup>, and 200μL Cr<sub>2</sub>O<sub>7</sub><sup>2-</sup> aqueous solution, respectively).
